# Supplementary material for: The effect of sugar stereochemistry on protein self-assembly: the case of β-casein micellization in different aldohexose solutions
Source: Royal Society of Chemistry journal article supplement (doi:10.1039/c4cp03686g), 2014-12-16
Supplement: c4cp03686g1.pdf [file c4cp03686g1.pdf]

## **The Effect of Sugar Stereochemistry on Protein Self-Assembly: The Case of $\beta$ -Casein Micellization in Sugar Solutions**

**Ofer Setter<sup>a</sup> and Yoav D. Livney<sup>\*a,b</sup>**

<sup>a</sup> Department of Biotechnology and Food Engineering, and <sup>b</sup> Russell Berrie  
Nanotechnology Institute

Technion-Israel Institute of Technology, Haifa, 32000, Israel.

\*corresponding author: [livney@technion.ac.il](mailto:livney@technion.ac.il). Phone: +972-4-8294225 ; Fax: +972-4-8293399

### **Supporting Information**

#### **Appendix A – Calculating molar concentrations of the samples**

The molar concentration of each sample was calculated by Eq. (1):

$$C = \frac{m_c}{V_{total} \cdot MW_c} \cdot 1000 \text{ ml/l} \quad (1)$$

$C$  = final co-solute concentration [*Molar*];  $m_c$  = co-solute mass in a sample [*gr*] see Eq.

(2);  $MW_c$  = co-solute molecular mass [ $\frac{\text{gr}}{\text{mole}}$ ];  $V_{total}$  = Total sample volume [*ml*]

Solute mass in sample was evaluated by Eq. (2):

$$m_c = \rho \cdot v \cdot f_C = \rho \cdot v \cdot \frac{m_{c0}}{m_{c0} + m_{PBS0}} = \rho \cdot v \cdot \frac{m_{c0}}{m_{c0} + v_{PBS0} \cdot \rho_{PBS0}} \quad *$$
 (2)

$\rho$  = co-solute stock solution density  $\left[\frac{gr}{ml}\right]$ ;  $v$  = volume of co-solute stock solution in sample  $[ml]$ ;  $f_C$  = mass fraction of co-solute in co-solute stock solution  $\left[\frac{gr}{gr}\right]$ ;  $m_{c0}$  = mass of co-solute in co-solute stock solution  $[gr]$ ;  $m_{PBS0}$  = PBS mass in co-solute stock solution  $[gr]$ ;  $v_{PBS0}$  = PBS volume in co-solute stock solution  $[ml]$ ;  $\rho_{PBS0}$  = PBS density  $\left[\frac{gr}{ml}\right]$  \*.

\* Approximated as 1 gr/ml according to average of 6 analytical weight measurements of carefully pipetted 1ml of PBS ( $1.005 \pm 0.003 \frac{gr}{ml}$ )

### **Appendix B – Modeling of I1/I3 Vs. $\beta$ -Cas concentration Sigmoid**

We defined the fraction of pyrene which entered the micelles formed as  $f$ . The protein concentration was expressed as  $C \left[\frac{mg}{ml}\right]$ . As both the processes of micellization and the partition of pyrene inside and out of the micelles, are reversible equilibrium processes, the CMC was defined as the concentration at which  $f = 0.5$ . We further expressed the cooperativity of the micellization by a parameter ( $K$ ) which expresses the sigmoidal slope steepness. By combining these requirements and the expected sigmoidal behavior of the function we obtained Eq (3).

$$f = \frac{1}{1 + \left(\frac{CMC}{C}\right)^K} \quad (3)$$

I3/I1 ratio is limited between two finite extreme cases: I3/I1 ratio for  $C = 0$

$\left(\left(\frac{I_3}{I_1}\right)_{C=0}\right)$ , when its value should resemble that of pyrene in pure PBS, and I3/I1 ratio

for  $C = \infty$   $\left(\left(\frac{I_3}{I_1}\right)_{C=\infty}\right)$ , when all of the pyrene is thought to be confined inside micellar

hydrophobic cores and the expected value should be the maximal value of I3/I1 ratio.

The relation between I3/I1 ratio and  $f$  is thus:

$$\frac{I_3}{I_1} = \left(\frac{I_3}{I_1}\right)_{C=\infty} \cdot f + \left(\frac{I_3}{I_1}\right)_{C=0} \cdot (1-f) \quad (4)$$

Combining Eq. (3) and Eq. (4) we get the complete sigmoidal model equation:

$$\frac{I_3}{I_1} = \left(\frac{I_3}{I_1}\right)_{C=\infty} \cdot \left(\frac{1}{1 + \left(\frac{CMC}{C}\right)^K}\right) + \left(\frac{I_3}{I_1}\right)_{C=0} \cdot \left(1 - \frac{1}{1 + \left(\frac{CMC}{C}\right)^K}\right) \quad (5)$$
